# Supplementary figures and images for: Carbonic anhydrase II as host protein for the creation of a biocompatible artificial metathesase
Source: Royal Society of Chemistry journal article supplement (doi:10.1039/c5ob00428d), 2015-01-01

[M-Cl]<sup>+</sup>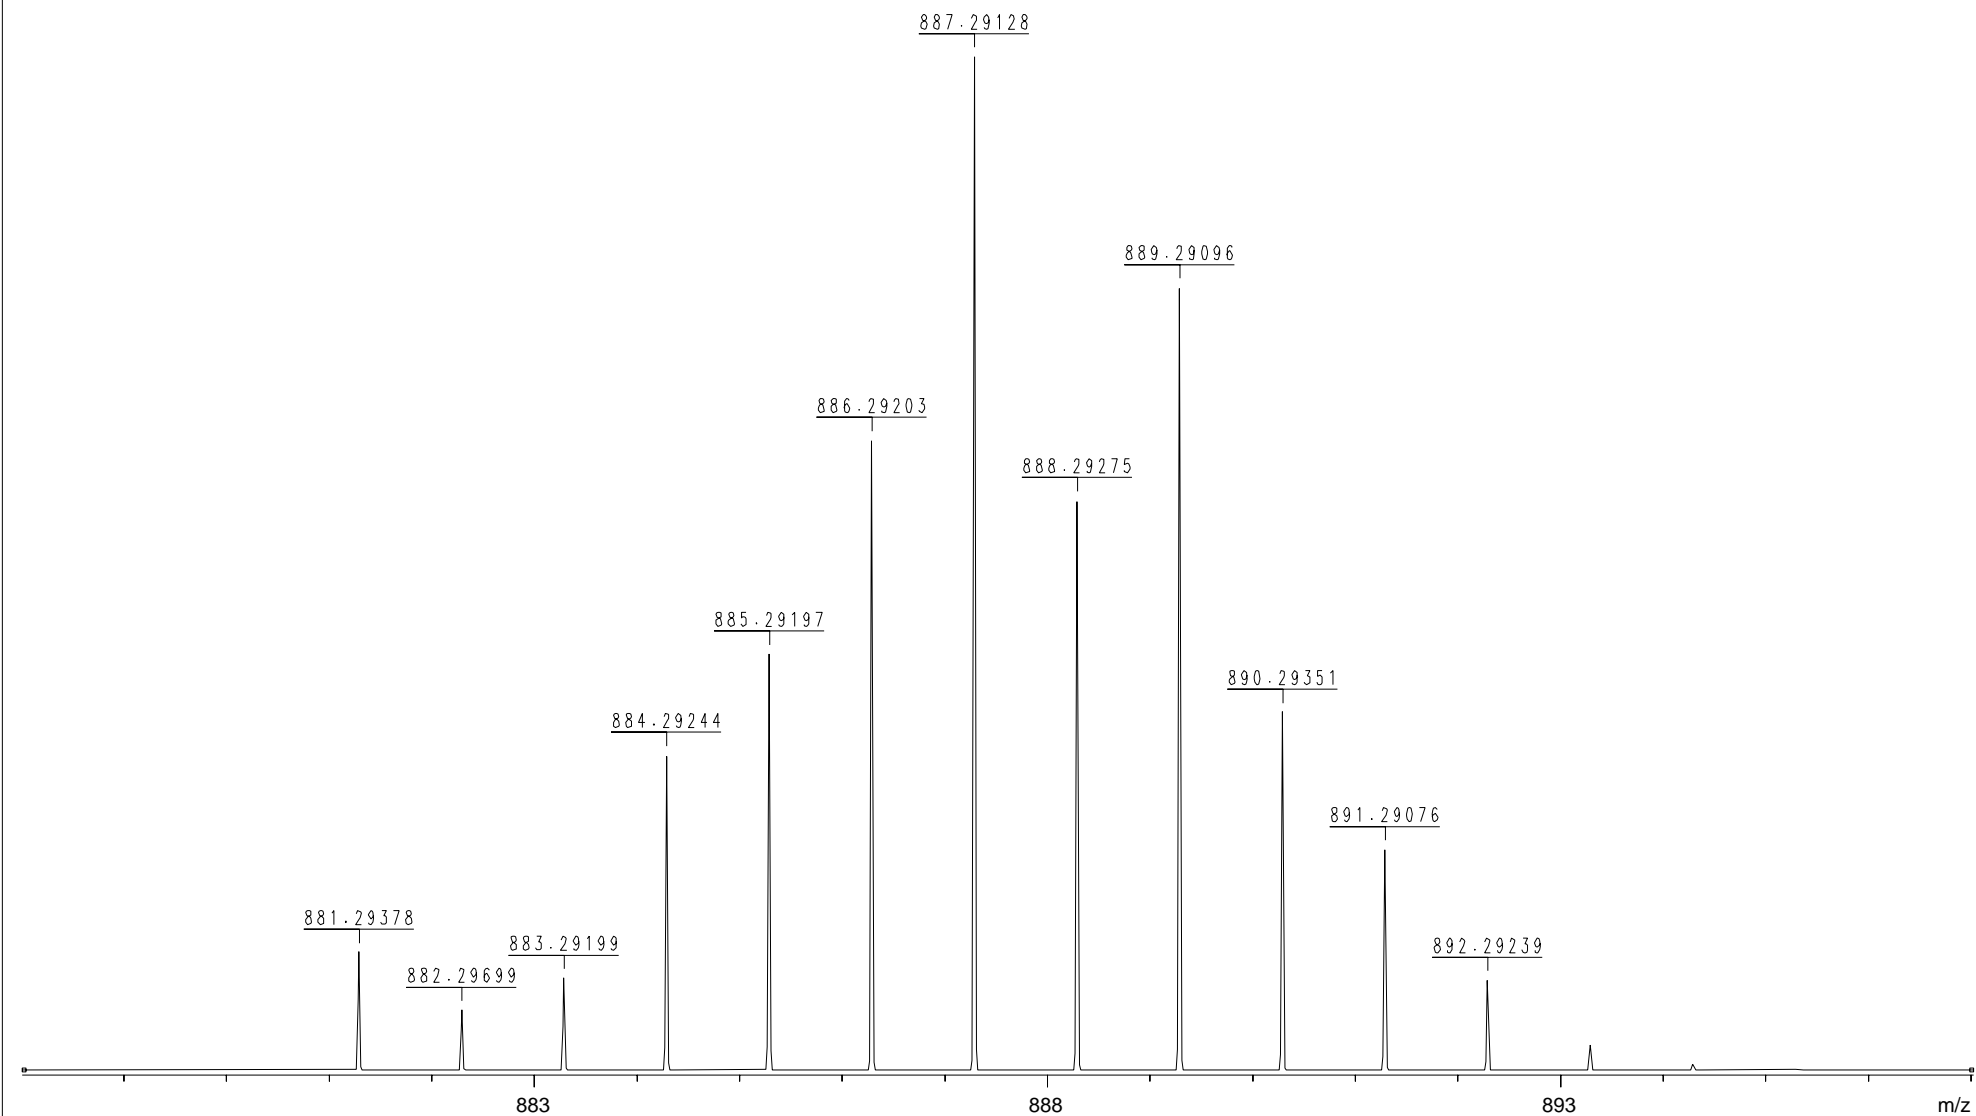

Supplement: c5ob00428d2.pdf [file c5ob00428d2.pdf]

[M-Cl]<sup>+</sup>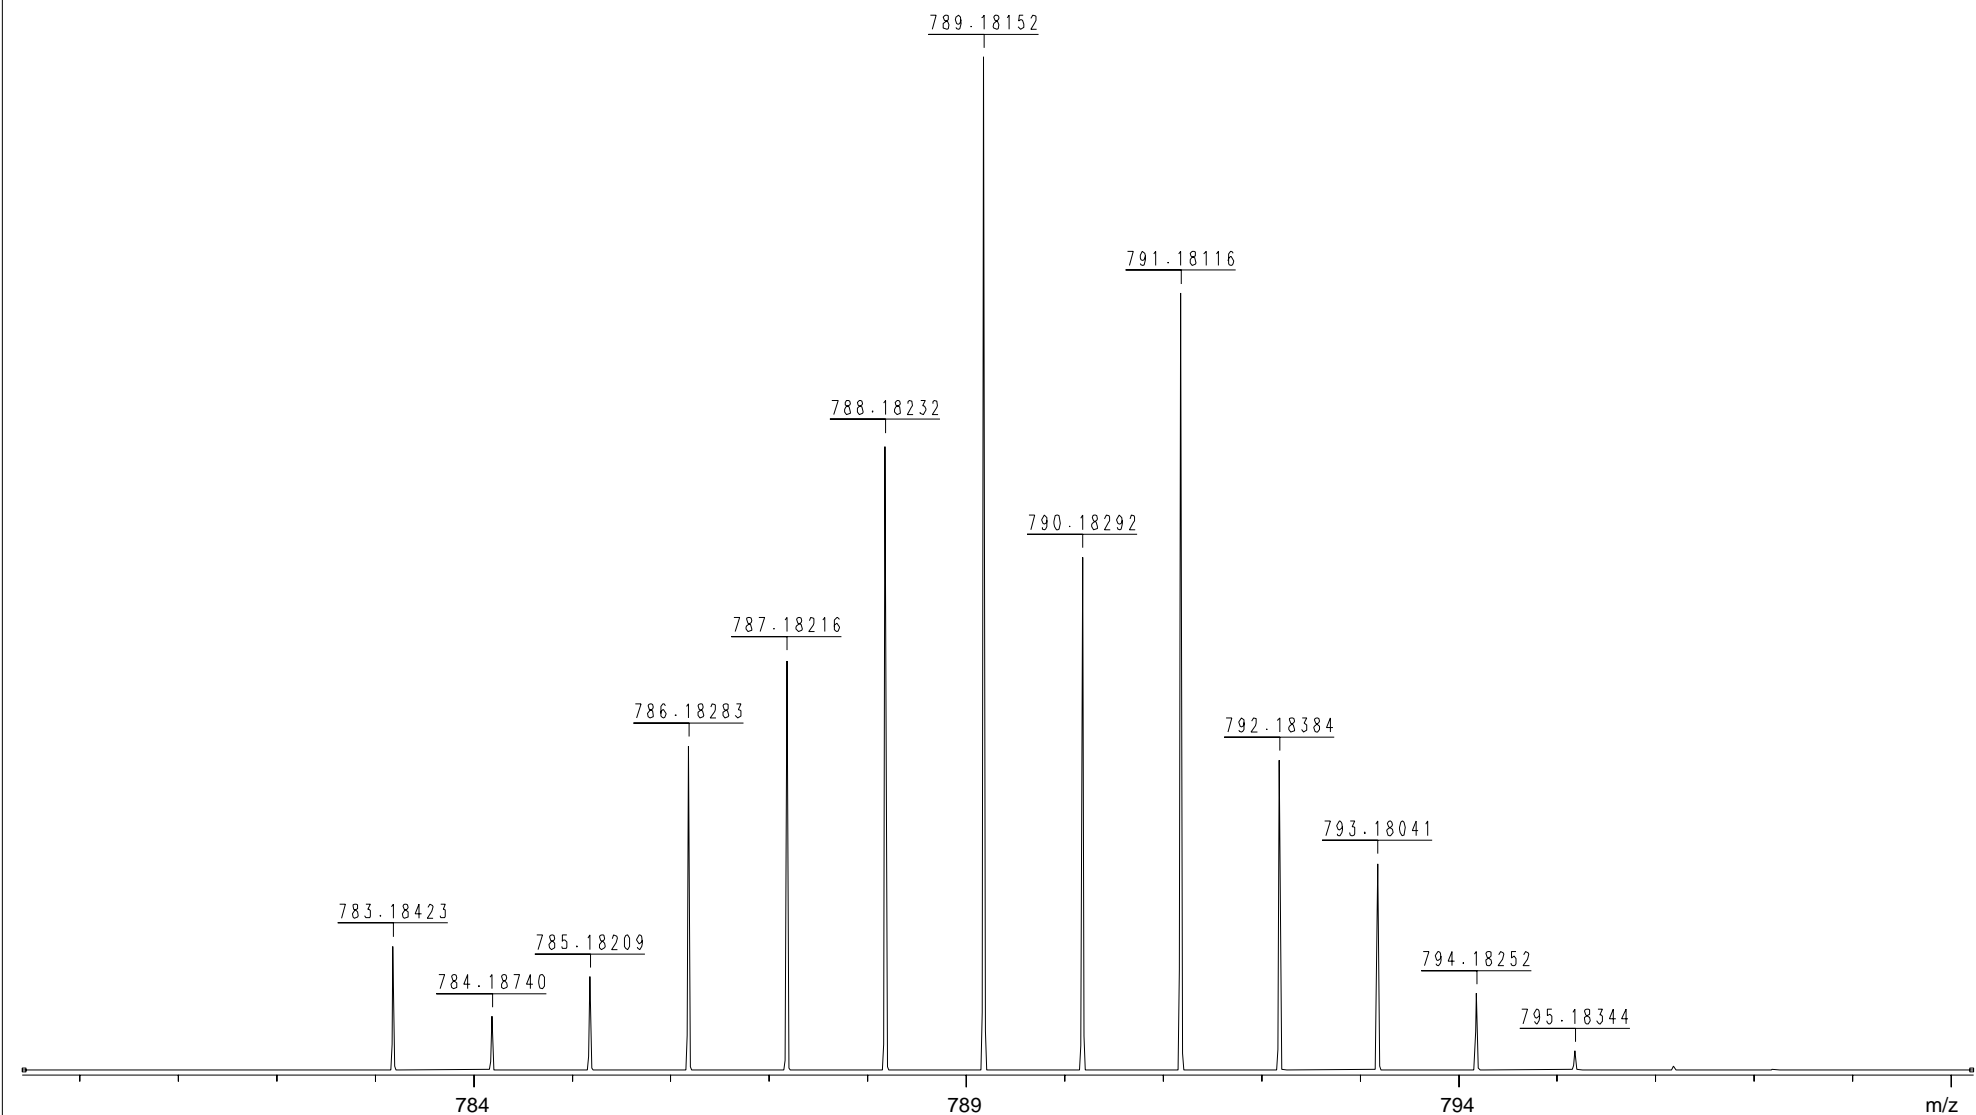

Supplement: c5ob00428d3.pdf [file c5ob00428d3.pdf]
